# Supplementary material for: Ordering by cation replacement in the system Na2−xLixGa7
Source: Royal Society of Chemistry journal article supplement (doi:10.1039/d3dt03628f), 2023-12-15
Supplement: d3dt03628f1.pdf [file d3dt03628f1.pdf]

## Supporting Information

### Ordering by substitution: the case of $\text{Na}_{2-x}\text{Li}_x\text{Ga}_7$

Chia-Chi Yu,<sup>a</sup> Yurii Prots,<sup>a</sup> Alim Ormeci,<sup>a</sup> Mitja Krnel,<sup>a</sup> Marcus Schmidt,<sup>a</sup> Lev Akselrud,<sup>a,b</sup> Frank R. Wagner,<sup>a</sup> Yuri Grin<sup>a</sup> and Michael Baitinger<sup>\*a</sup>

<sup>a</sup>Max-Planck-Institut für Chemische Physik fester Stoffe, Nöthnitzer Str. 40, 01187 Dresden, Germany

<sup>b</sup>Ivan Franko Lviv National University, Kyryla i Mefodia St. 6, 29005 Lviv, Ukraine

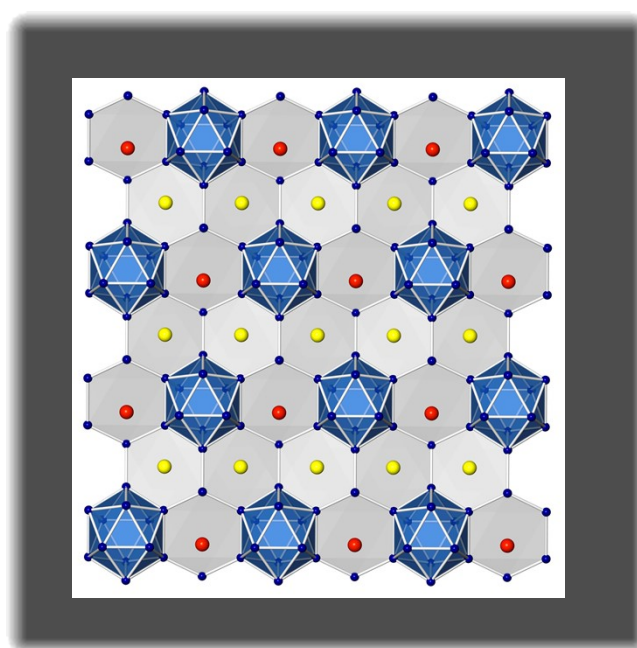

#### Table of content:

|                                                                                                                                   |     |
|-----------------------------------------------------------------------------------------------------------------------------------|-----|
| Crystallographic data for NaLiGa <sub>7</sub>                                                                                     | S1  |
| Atomic coordinates and displacement parameters for NaLiGa <sub>7</sub>                                                            | S2  |
| Selected interatomic distances in NaLiGa <sub>7</sub>                                                                             | S3  |
| Selected bond angles in NaLiGa <sub>7</sub>                                                                                       | S4  |
| DTA measurements of Na <sub>2</sub> Ga <sub>7</sub> , Na <sub>1.8</sub> Li <sub>0.2</sub> Ga <sub>7</sub> and NaLiGa <sub>7</sub> | S5  |
| Structure model of NaLiGa <sub>7</sub> with large ADPs of Na1 atoms                                                               | S6  |
| Crystallographic data from PXRD for Na <sub>2-x</sub> Li <sub>x</sub> Ga <sub>7</sub>                                             | S7  |
| Ga framework in NaLiGa <sub>7</sub>                                                                                               | S10 |
| Distortion of the Ga icosahedron in NaLiGa <sub>7</sub>                                                                           | S11 |
| Cation occupancies in NaLiGa <sub>7</sub> and Na <sub>2</sub> Ga <sub>7</sub>                                                     | S12 |
| Experimental cation occupancies in Na <sub>2-x</sub> Li <sub>x</sub> Ga <sub>7</sub>                                              | S13 |
| Depth of C1 hollow                                                                                                                | S14 |
| Susceptibility measurement of NaLiGa <sub>7</sub>                                                                                 | S15 |
| References                                                                                                                        | S16 |

**Table S1** Crystallographic data for NaLiGa<sub>7</sub>.

|                                                      |                                                                    |
|------------------------------------------------------|--------------------------------------------------------------------|
| Composition                                          | NaLiGa <sub>7</sub>                                                |
| Molar mass / g mol <sup>-1</sup>                     | 517.991                                                            |
| Crystal system; space group                          | orthorhombic, <i>Cmce</i> (no. 64)                                 |
| <i>a</i> / Å                                         | 8.562(1)                                                           |
| <i>b</i> / Å                                         | 14.822(2)                                                          |
| <i>c</i> / Å                                         | 11.454(2)                                                          |
| <i>V</i> / Å <sup>3</sup>                            | 1453.6(4)                                                          |
| <i>Z</i> ; $\rho_{\text{calc}}$ / g cm <sup>-3</sup> | 8; 4.719                                                           |
| Diffractometer                                       | Rigaku AFC7, Saturn 724+CCD detector                               |
| $\lambda$ / Å                                        | 0.71073 (MoK $\alpha$ )                                            |
| Temperature / K                                      | 293                                                                |
| Crystal shape                                        | irregular                                                          |
| Crystal size / mm                                    | 0.12 × 0.08 × 0.06                                                 |
| $\mu$ / mm <sup>-1</sup>                             | 25.51                                                              |
| Absorption correction                                | multi-scan                                                         |
| $\theta$ range / deg.                                | 2.75–37.00                                                         |
| Indexes ranges                                       | $-14 \leq h \leq 12$ , $-23 \leq k \leq 25$ , $-10 \leq l \leq 19$ |
| <i>F</i> (000) / e                                   | 1848                                                               |
| Independent reflections                              | 1949                                                               |
| Reflections $F_o > 4\sigma F$                        | 1760                                                               |
| Parameters refined                                   | 49                                                                 |
| Goof                                                 | 1.123                                                              |
| $R_1$ , $F_o > 4\sigma F_o$                          | 0.0343                                                             |
| $R_1$ , all data                                     | 0.0414                                                             |

**Table S2** Atomic coordinates and displacement parameters (in Å<sup>2</sup>) for NaLiGa<sub>7</sub>.

| Atom | Site        | Occupancy | $x/a$      | $y/b$      | $z/c$      | $U_{eq}/U_{iso}$ | $U_{11}$  | $U_{22}$  | $U_{33}$  | $U_{12}$   | $U_{13}$   | $U_{23}$   |
|------|-------------|-----------|------------|------------|------------|------------------|-----------|-----------|-----------|------------|------------|------------|
| Ga1  | 8 <i>f</i>  | 1         | 0          | 0.10624(5) | 0.81844(7) | 0.0133(2)        | 0.0166(3) | 0.0113(3) | 0.0119(3) | 0          | 0          | 0.0018(2)  |
| Ga2  | 8 <i>f</i>  | 1         | 0          | 0.17692(5) | 0.04241(7) | 0.0132(2)        | 0.0169(3) | 0.0075(2) | 0.0151(3) | 0          | 0          | -0.0016(2) |
| Ga3  | 16 <i>g</i> | 1         | 0.15421(6) | 0.05125(3) | 0.16733(4) | 0.0118(1)        | 0.0145(2) | 0.0104(2) | 0.0105(2) | -0.0001(1) | -0.0010(2) | -0.0002(1) |
| Ga4  | 16 <i>g</i> | 1         | 0.24534(7) | 0.08882(3) | 0.95650(4) | 0.0121(1)        | 0.0137(2) | 0.0104(2) | 0.0123(2) | -0.0009(2) | 0.0001(2)  | 0.0004(1)  |
| Ga5  | 8 <i>f</i>  | 1         | 0          | 0.15956(5) | 0.60329(7) | 0.0124(2)        | 0.0139(3) | 0.0074(2) | 0.0159(3) | 0          | 0          | 0.0006(2)  |
| Li1  | 8 <i>f</i>  | 1         | 0          | 0.039(1)   | 0.390(2)   | 0.034(5)         | 0.055(11) | 0.023(7)  | 0.026(7)  | 0          | 0          | 0.008(6)   |
| Na1a | 8 <i>e</i>  | 0.5       | ¼          | 0.2451(5)  | ¼          | 0.0202(9)        | -         | -         | -         | -          | -          | -          |
| Na1b | 16 <i>g</i> | 0.25      | 0.211(2)   | 0.2411(9)  | 0.289(1)   | 0.0341(12)       | -         | -         | -         | -          | -          | -          |

$U_{eq}$  is defined as one third of the trace of the orthogonalized  $U_{ij}$  tensor, which is  $\exp(-2\pi^2 [h^2 a^{*2} U_{11} + \dots + 2 h k a^* b^* U_{12}])$

**Table S3** Ga–Ga interatomic distances in NaLiGa<sub>7</sub>. The distances are classified in exo- and endo-bonds of the Ga<sub>12</sub> icosahedron (Ga1–Ga4) and the 4-bonded atom (Ga5).

| <b>Ga–Ga</b> | <b><i>d</i> / Å</b> |    |      |
|--------------|---------------------|----|------|
| Ga1–Ga5      | 2.588(1)            | 1× | exo  |
| –Ga4         | 2.6419(8)           | 2× | endo |
| –Ga3         | 2.6868(8)           | 2× | endo |
| –Ga5         | 2.7710(1)           | 1× | endo |
| Ga2–Ga5      | 2.522(1)            | 1× | exo  |
| –Ga4         | 2.6619(7)           | 2× | endo |
| –Ga3         | 2.6945(8)           | 2× | endo |
| –Ga1         | 2.771(1)            | 1× | endo |
| Ga3–Ga3      | 2.5054(7)           | 1× | exo  |
| –Ga4         | 2.5981(8)           | 1× | endo |
| –Ga4         | 2.6326(7)           | 1× | endo |
| –Ga3         | 2.6407(8)           | 1× | endo |
| –Ga1         | 2.6868(8)           | 1× | endo |
| –Ga2         | 2.6945(8)           | 1× | endo |
| Ga4–Ga5      | 2.5145(7)           | 1× | exo  |
| –Ga3         | 2.5981(8)           | 1× | endo |
| –Ga3         | 2.6326(7)           | 1× | endo |
| –Ga1         | 2.6419(8)           | 1× | endo |
| –Ga2         | 2.6619(7)           | 1× | endo |
| –Ga4         | 2.8152(7)           | 1× | endo |
| Ga5–Ga4      | 2.5145(7)           | 2× |      |
| –Ga2         | 2.522(1)            | 1× | 4b   |
| –Ga1         | 2.588(1)            | 1× |      |

**Table S4** Ga–Ga–Ga bond angles in the Ga<sub>12</sub> icosahedron of NaLiGa<sub>7</sub>.

| $\angle$ Ga–Ga–Ga    | Deg / °      | $\angle$ Ga–Ga–Ga    | Deg / °      |
|----------------------|--------------|----------------------|--------------|
| Ga2– <b>Ga1</b> –Ga3 | 105.80(1) 4× | Ga1– <b>Ga2</b> –Ga3 | 103.31(1) 4× |
| Ga2– <b>Ga1</b> –Ga4 | 58.86(1) 4×  | Ga1– <b>Ga2</b> –Ga4 | 58.15(1) 4×  |
| Ga3– <b>Ga1</b> –Ga3 | 58.87(1) 2×  | Ga3– <b>Ga2</b> –Ga3 | 58.68(1) 2×  |
| Ga3– <b>Ga1</b> –Ga4 | 59.21(2) 4×  | Ga3– <b>Ga2</b> –Ga4 | 58.03(2) 4×  |
| Ga3– <b>Ga1</b> –Ga4 | 105.64(2) 4× | Ga3– <b>Ga2</b> –Ga4 | 104.12(2) 4× |
| Ga4– <b>Ga1</b> –Ga4 | 105.33(2) 2× | Ga4– <b>Ga2</b> –Ga4 | 104.21(2) 2× |
| Ga1– <b>Ga3</b> –Ga2 | 113.08(2) 4× | Ga1– <b>Ga4</b> –Ga2 | 62.99(1) 4×  |
| Ga1– <b>Ga3</b> –Ga3 | 60.57(1) 4×  | Ga1– <b>Ga4</b> –Ga3 | 61.25(2) 4×  |
| Ga1– <b>Ga3</b> –Ga4 | 59.55(2) 4×  | Ga1– <b>Ga4</b> –Ga3 | 109.79(3) 4× |
| Ga1– <b>Ga3</b> –Ga4 | 112.97(2) 4× | Ga1– <b>Ga4</b> –Ga4 | 107.65(2) 4× |
| Ga2– <b>Ga3</b> –Ga3 | 60.66(2) 4×  | Ga2– <b>Ga4</b> –Ga3 | 61.61(2) 4×  |
| Ga2– <b>Ga3</b> –Ga4 | 60.36(2) 4×  | Ga2– <b>Ga4</b> –Ga3 | 110.62(3) 4× |
| Ga2– <b>Ga3</b> –Ga4 | 113.85(2) 4× | Ga2– <b>Ga4</b> –Ga4 | 109.14(2) 4× |
| Ga3– <b>Ga3</b> –Ga4 | 107.24(2) 4× | Ga3– <b>Ga4</b> –Ga3 | 104.05(2) 4× |
| Ga3– <b>Ga3</b> –Ga4 | 107.48(3) 4× | Ga3– <b>Ga4</b> –Ga4 | 56.85(2) 4×  |
| Ga4– <b>Ga3</b> –Ga4 | 65.12(2) 4×  | Ga3– <b>Ga4</b> –Ga4 | 58.03(2) 4×  |

**Table S5** Ga–Ga–Ga bond angles for the 4-bonded Ga atoms of NaLiGa<sub>7</sub>.

| $\angle$ Ga–Ga–Ga    | Deg / °      |
|----------------------|--------------|
| Ga1– <b>Ga5</b> –Ga2 | 123.83(4) 1× |
| Ga1– <b>Ga5</b> –Ga4 | 97.59(1) 2×  |
| Ga2– <b>Ga5</b> –Ga4 | 108.99(1) 2× |
| Ga4– <b>Ga5</b> –Ga4 | 120.26(2) 1× |

**Table S6** DTA measurements of  $\text{Na}_2\text{Ga}_7$ ,  $\text{Na}_{1.8}\text{Li}_{0.2}\text{Ga}_7$  and  $\text{NaLiGa}_7$ . Presented are endothermic effects on heating and products after cooling identified by PXRD. Temperatures for the first effect represent the onset temperature, those for the second effect are estimated. The experimental error for the first effect is lower than 2 °C.

| <b>Composition</b>                                            | <b>1<sup>st</sup> effect <math>T</math> / °C</b> | <b>2<sup>nd</sup> effect <math>T</math> / °C</b> | <b>Final products</b>                                                        |
|---------------------------------------------------------------|--------------------------------------------------|--------------------------------------------------|------------------------------------------------------------------------------|
| <b><math>\text{Na}_2\text{Ga}_7</math></b> <sup>1</sup>       | 501                                              | 515                                              | $\text{Na}_7\text{Ga}_{13}$ , <sup>2</sup> $\text{NaGa}_4$ , <sup>3</sup> Ga |
| <b><math>\text{Na}_{1.8}\text{Li}_{0.2}\text{Ga}_7</math></b> | 498                                              | 509                                              | $\text{Na}_{2-x}\text{Li}_x\text{Ga}_7$ , $\text{NaGa}_4$ , unknown          |
| <b><math>\text{NaLiGa}_7</math></b>                           | 489                                              | 505                                              | $\text{Na}_{2-x}\text{Li}_x\text{Ga}_7$ and $\text{LiGa}_2$ <sup>4</sup>     |

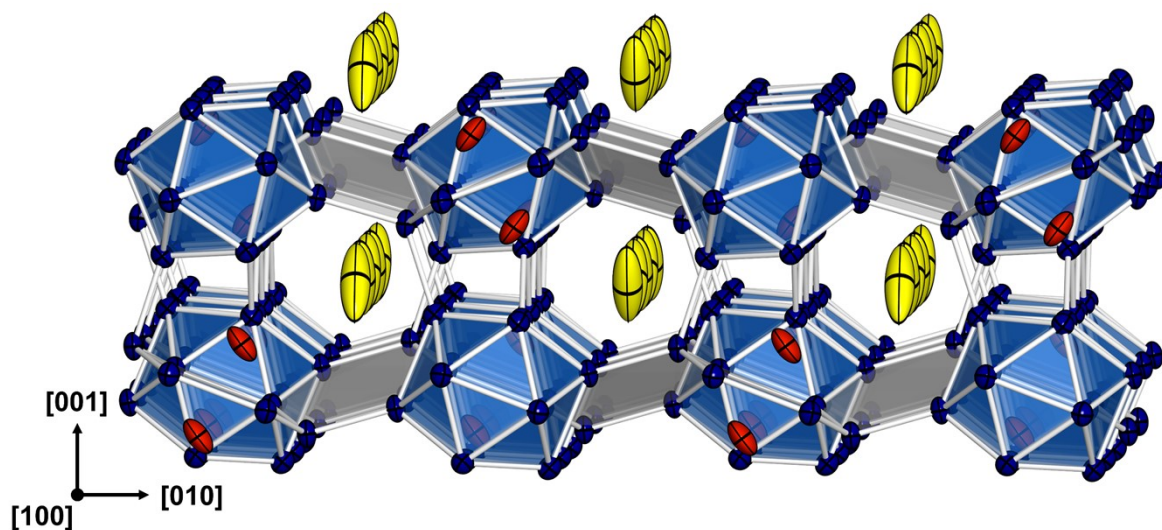

**Fig. S1** Structure model of  $\text{NaLiGa}_7$ , view along  $[100]$ . The ADPs of Na1 (yellow, 95 % probability) show a large and cigar-shaped ellipsoid. Li1 atoms (red) occupy caves between three icosaheda.

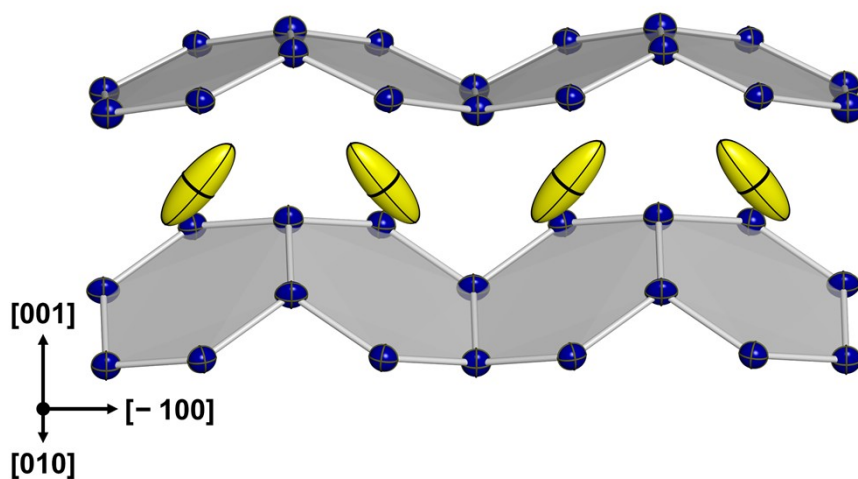

**Fig. S2** Orientation of the Na1 ellipsoids (yellow, 95 % probability) aligning to the walls.

**Table S7a** Crystallographic data for Na<sub>1.8</sub>Li<sub>0.2</sub>Ga<sub>7</sub> obtained from PXRD data.

|                                        |                                       |
|----------------------------------------|---------------------------------------|
| Crystal system; space group            | orthorhombic, <i>Pnma</i> (no. 62)    |
| <i>a</i> / Å                           | 14.847(3)                             |
| <i>b</i> / Å                           | 8.646(2)                              |
| <i>c</i> / Å                           | 11.558(3)                             |
| <i>V</i> / Å <sup>3</sup>              | 1483.7(6)                             |
| <i>Z</i>                               | 8                                     |
| Diffractometer                         | Guinier-Huber Image Plate Camera G670 |
| $\lambda$ / Å                          | 1.54056 (CuK $\alpha$ 1)              |
| Temperature / K                        | 293                                   |
| $2\theta$ ; $\sin\theta/\lambda$ (max) | 100.30; 0.498                         |
| Reflections used for refinement        | 839                                   |
| Parameters refined                     | 137                                   |
| $R_i$ ; $R_p$                          | 0.0604; 0.0352                        |

The lattice parameters were refined from individual peak positions extracted from the powder diffraction pattern by using LaB<sub>6</sub> as internal standard. Standard deviations were calculated considering the Berar factor of 5.09.

**Table S7b** Atomic coordinates and displacement parameters (in Å<sup>2</sup>) for Na<sub>1.8</sub>Li<sub>0.2</sub>Ga<sub>7</sub>.

| Atom | Site       | Occupancy | <i>x</i> / <i>a</i> | <i>y</i> / <i>b</i> | <i>z</i> / <i>c</i> | <i>U</i> <sub>iso</sub> |
|------|------------|-----------|---------------------|---------------------|---------------------|-------------------------|
| Ga1  | 4 <i>c</i> | 1         | 0.6521(2)           | ¼                   | 0.8241(4)           | 0.0079(3)               |
| Ga2  | 4 <i>c</i> | 1         | 0.8624(2)           | ¼                   | 0.1835(4)           | 0.0099(3)               |
| Ga3  | 4 <i>c</i> | 1         | 0.9253(3)           | ¼                   | 0.9501(4)           | 0.0139(3)               |
| Ga4  | 4 <i>c</i> | 1         | 0.5761(3)           | ¼                   | 0.0420(4)           | 0.0113(3)               |
| Ga5  | 8 <i>d</i> | 1         | 0.8043(2)           | 0.0928(3)           | 0.8348(3)           | 0.0095(3)               |
| Ga6  | 8 <i>d</i> | 1         | 0.7056(2)           | 0.0966(3)           | 0.1685(3)           | 0.0094(3)               |
| Ga7  | 8 <i>d</i> | 1         | 0.6654(2)           | 0.0028(5)           | 0.9577(2)           | 0.0138(3)               |
| Ga8  | 8 <i>d</i> | 1         | 0.8444(2)           | 0.0031(5)           | 0.0477(2)           | 0.0091(3)               |
| Ga9  | 4 <i>c</i> | 1         | 0.0871(3)           | ¼                   | 0.8811(3)           | 0.0093(3)               |
| Ga10 | 4 <i>c</i> | 1         | 0.4120(3)           | ¼                   | 0.1032(3)           | 0.0122(3)               |
| Na1  | 4 <i>c</i> | 0.48(2)   | 0.291(1)            | ¼                   | 0.895(2)            | 0.01867(7)              |
| Li1  | 4 <i>c</i> | 0.52(2)   | 0.291(1)            | ¼                   | 0.895(2)            | 0.01867(7)              |
| Na2  | 4 <i>c</i> | 0.79(1)   | 0.0964(9)           | ¼                   | 0.133(1)            | 0.01867(7)              |
| Na3  | 8 <i>d</i> | 1         | 0.4909(5)           | 0.0349(7)           | 0.8159(6)           | 0.034(2)                |



**Table S8a** Crystallographic data for Na<sub>1.5</sub>Li<sub>0.5</sub>Ga<sub>7</sub> obtained from PXRD data.

|                                        |                                       |
|----------------------------------------|---------------------------------------|
| Crystal system; space group            | orthorhombic, <i>Pnma</i> (no. 62)    |
| <i>a</i> / Å                           | 14.834(1)                             |
| <i>b</i> / Å                           | 8.5956(9)                             |
| <i>c</i> / Å                           | 11.488(2)                             |
| <i>V</i> / Å <sup>3</sup>              | 1464.8(3)                             |
| <i>Z</i>                               | 8                                     |
| Diffractometer                         | Guinier-Huber Image Plate Camera G670 |
| $\lambda$ / Å                          | 1.54056 (CuK $\alpha$ 1)              |
| Temperature / K                        | 293                                   |
| $2\theta$ ; $\sin\theta/\lambda$ (max) | 100.30; 0.498                         |
| Reflections used for refinement        | 826                                   |
| Parameters refined                     | 147                                   |
| $R_i$ ; $R_p$                          | 0.0940; 0.0581                        |

The lattice parameters were refined from individual peak positions extracted from the powder diffraction pattern by using LaB<sub>6</sub> as internal standard. Standard deviations were calculated considering the Berar factor of 6.65.

**Table S8b** Atomic coordinates and displacement parameters (in Å<sup>2</sup>) for Na<sub>1.5</sub>Li<sub>0.5</sub>Ga<sub>7</sub>.

| Atom | Site       | Occupancy | <i>x</i> / <i>a</i> | <i>y</i> / <i>b</i> | <i>z</i> / <i>c</i> | <i>U</i> <sub>iso</sub> |
|------|------------|-----------|---------------------|---------------------|---------------------|-------------------------|
| Ga1  | 4 <i>c</i> | 1         | 0.6544(3)           | ¼                   | 0.8219(4)           | 0.0099(4)               |
| Ga2  | 4 <i>c</i> | 1         | 0.8594(3)           | ¼                   | 0.1862(4)           | 0.0159(4)               |
| Ga3  | 4 <i>c</i> | 1         | 0.9266(3)           | ¼                   | 0.9532(4)           | 0.0177(4)               |
| Ga4  | 4 <i>c</i> | 1         | 0.5772(3)           | ¼                   | 0.0437(4)           | 0.0150(4)               |
| Ga5  | 8 <i>d</i> | 1         | 0.8065(2)           | 0.0928(4)           | 0.8275(3)           | 0.0111(3)               |
| Ga6  | 8 <i>d</i> | 1         | 0.7062(2)           | 0.0955(4)           | 0.1664(3)           | 0.0122(3)               |
| Ga7  | 8 <i>d</i> | 1         | 0.6675(2)           | 0.9987(4)           | 0.9557(3)           | 0.0107(3)               |
| Ga8  | 8 <i>d</i> | 1         | 0.8482(2)           | 0.0062(4)           | 0.0440(3)           | 0.0109(4)               |
| Ga9  | 4 <i>c</i> | 1         | 0.0857(3)           | ¼                   | 0.8846(3)           | 0.0077(4)               |
| Ga10 | 4 <i>c</i> | 1         | 0.4152(3)           | ¼                   | 0.0992(4)           | 0.0137(4)               |
| Na1a | 4 <i>c</i> | 0.69(2)   | 0.088(1)            | ¼                   | 0.139(2)            | 0.01376(9)              |
| Na1b | 4 <i>c</i> | 0.31(2)   | 0.027(2)            | ¼                   | 0.141(4)            | 0.01385(9)              |
| Li1  | 4 <i>c</i> | 0.38(5)   | 0.858(9)            | ¼                   | 0.64(1)             | 0.01382(9)              |
| Na2  | 8 <i>d</i> | 1         | 0.4910(5)           | 0.0497(8)           | 0.8235(8)           | 0.028(2)                |

**Table S9a** Crystallographic data for Na<sub>1.2</sub>Li<sub>0.8</sub>Ga<sub>7</sub> obtained from PXRD data.

|                                        |                                       |
|----------------------------------------|---------------------------------------|
| Crystal system; space group            | orthorhombic, <i>Cmce</i> (no. 64)    |
| <i>a</i> / Å                           | 8.5692(9)                             |
| <i>b</i> / Å                           | 14.836(2)                             |
| <i>c</i> / Å                           | 11.466(2)                             |
| <i>V</i> / Å <sup>3</sup>              | 1457.7(4)                             |
| <i>Z</i>                               | 8                                     |
| Diffractometer                         | Guinier-Huber Image Plate Camera G670 |
| $\lambda$ / Å                          | 1.54056 (CuK $\alpha$ 1)              |
| Temperature / K                        | 293                                   |
| $2\theta$ ; $\sin\theta/\lambda$ (max) | 100.40; 0.499                         |
| Reflections used for refinement        | 413                                   |
| Parameters refined                     | 63                                    |
| $R_i$ ; $R_p$                          | 0.0529; 0.0248                        |

The lattice parameters were refined from individual peak positions extracted from the powder diffraction pattern by using LaB<sub>6</sub> as internal standard. Standard deviations were calculated considering the Berar factor of 4.03.

**Table S9b** Atomic coordinates and displacement parameters (in Å<sup>2</sup>) for Na<sub>1.2</sub>Li<sub>0.8</sub>Ga<sub>7</sub>.

| Atom | Site        | Occupancy | <i>x</i> / <i>a</i> | <i>y</i> / <i>b</i> | <i>z</i> / <i>c</i> | <i>U</i> <sub>iso</sub> |
|------|-------------|-----------|---------------------|---------------------|---------------------|-------------------------|
| Ga1  | 8 <i>f</i>  | 1         | 0                   | 0.1077(2)           | 0.8218(3)           | 0.018(1)                |
| Ga2  | 8 <i>f</i>  | 1         | 0                   | 0.1782(3)           | 0.0440(2)           | 0.0089(7)               |
| Ga3  | 16 <i>g</i> | 1         | 0.1560(3)           | 0.0491(2)           | 0.1669(2)           | 0.0139(5)               |
| Ga4  | 16 <i>g</i> | 1         | 0.2471(2)           | 0.0890(2)           | 0.9573(1)           | 0.0111(4)               |
| Ga5  | 8 <i>f</i>  | 1         | 0                   | 0.1618(3)           | 0.6056(2)           | 0.0128(6)               |
| Li1  | 8 <i>f</i>  | 0.44(4)   | 0                   | 0.025(8)            | 0.391(7)            | 0.02*                   |
| Na1a | 8 <i>e</i>  | 0.44(2)   | ¼                   | 0.235(2)            | ¼                   | 0.0238(6)               |
| Na1b | 16 <i>g</i> | 0.56(2)   | 0.196(2)            | 0.232(2)            | 0.333(2)            | 0.0238(6)               |

\* The parameter was fixed in the final refinement cycle.

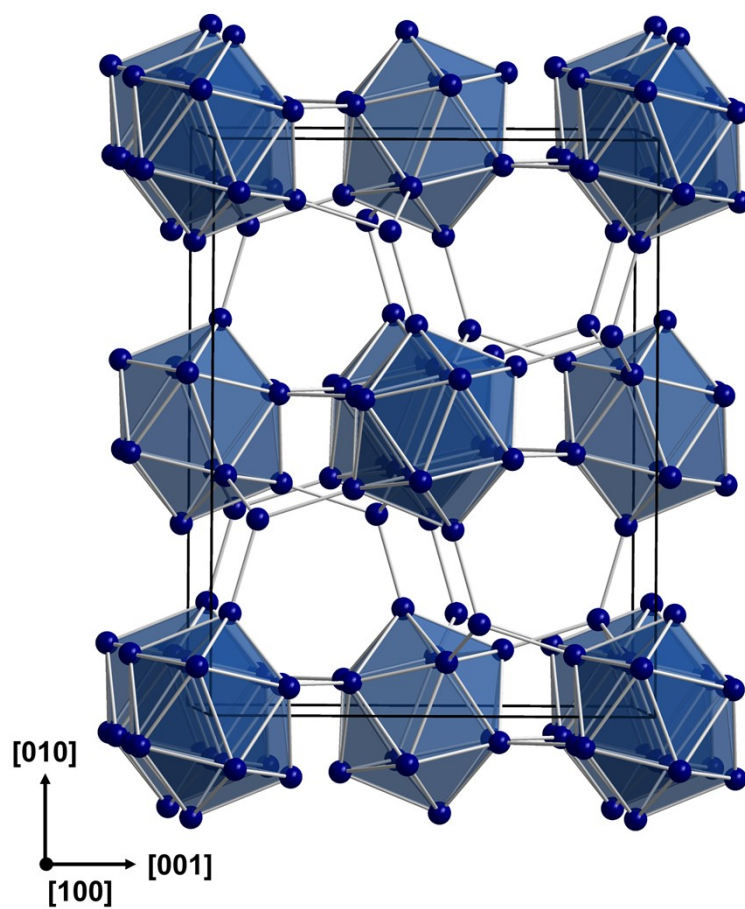

**Fig. S3** In the Ga framework in NaLiGa<sub>7</sub>, the centers of the Ga<sub>12</sub> icosahedra exhibit an *fcc*-like arrangement.

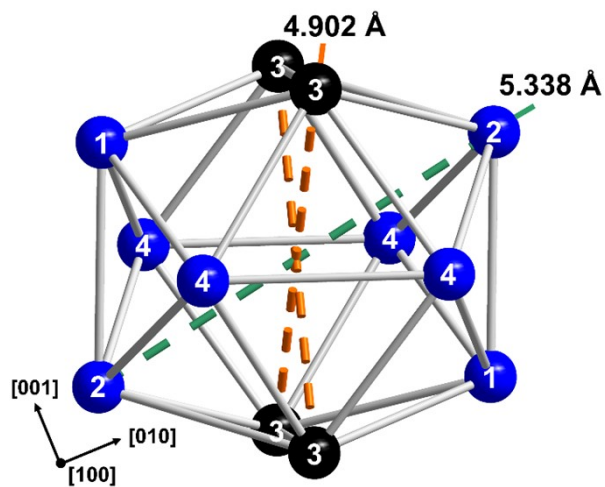

**Fig. S4** Distorted Ga icosahedron in NaLiGa<sub>7</sub> with different distances of atoms in *trans*-position. Atoms connected with 4-bonded Ga atoms are drawn in blue, atoms connected to an adjacent icosahedron in black.

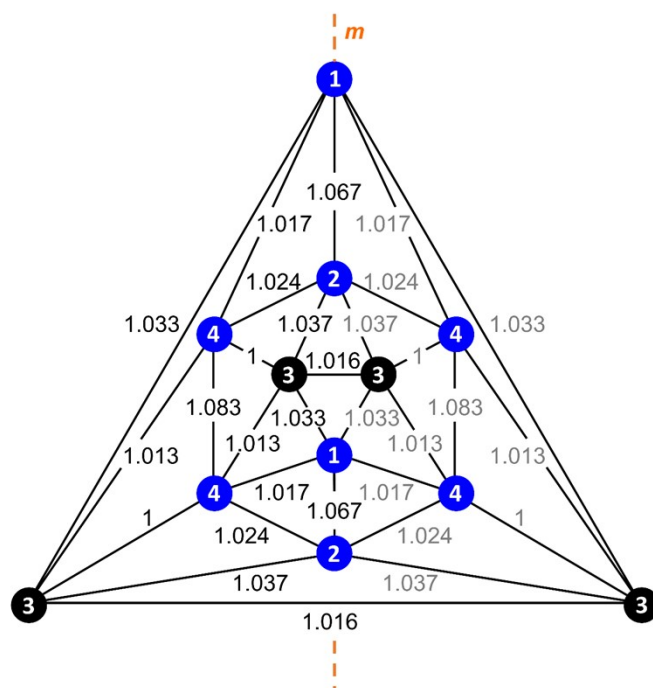

**Fig. S5** Schlegel graph of the Ga<sub>12</sub> icosahedron in NaLiGa<sub>7</sub> with distances normalized to the shortest Ga–Ga bond. Atoms connected with 4-bonded Ga atoms are drawn in blue, atoms forming exohedral bonds to neighboring icosahedra in black.

**Table S10** Wyckoff symbols and occupancy of the cation sites **C1**, **C2** and **C3** in NaLiGa<sub>7</sub> and Na<sub>2</sub>Ga<sub>7</sub>.

| Compound                                       | Wyckoff and occupancy                   |                                    |                                         |
|------------------------------------------------|-----------------------------------------|------------------------------------|-----------------------------------------|
|                                                | C1                                      | C2                                 | C3                                      |
| NaLiGa <sub>7</sub><br><i>Cmce</i>             | 8 <i>f</i>                              | 8 <i>e</i>                         | 8 <i>f</i>                              |
|                                                | (0, <i>y</i> , <i>z</i> )               | $\frac{1}{4}, y, \frac{1}{4}$      | (0, <i>y</i> , <i>z</i> )               |
|                                                | ●                                       | Na                                 | Li                                      |
| Na <sub>2</sub> Ga <sub>7</sub><br><i>Pnma</i> | 4 <i>c</i> 4 <i>c</i>                   | 8 <i>d</i>                         | 4 <i>c</i> 4 <i>c</i>                   |
|                                                | $\frac{1}{4}$                           | ( <i>x</i> , <i>y</i> , <i>z</i> ) | $\frac{1}{4}$                           |
|                                                | ( <i>x</i> , $\frac{1}{4}$ , <i>z</i> ) |                                    | ( <i>x</i> , $\frac{1}{4}$ , <i>z</i> ) |
|                                                | Na ●                                    | Na                                 | Na ●                                    |

**Table S11** Results of structure refinements for samples with composition of  $\text{Na}_{2-x}\text{Li}_x\text{Ga}_7$  ( $x = 0, 0.2, 0.5, 0.8, 1$ ). The gray shaded data originate from single-crystal diffraction, while the remaining data are from powder diffraction data. The challenge in determining partially occupied Na and Li positions allows only a qualitative interpretation of the powder data.

| Compound<br>( $Z = 8$ )                                    | $x$ | Wyckoff and occupancy |         |            |               |               | Sum occup.<br>of cations |
|------------------------------------------------------------|-----|-----------------------|---------|------------|---------------|---------------|--------------------------|
|                                                            |     | C1                    |         | C2         | C3            |               |                          |
| $\text{Na}_2\text{Ga}_7$<br><i>Pnma</i>                    | 0   | 4c<br>1 Na            | 4c<br>● | 8d<br>1 Na | 4c<br>1 Na    | 4c<br>●       | 16                       |
| $\text{Na}_{1.8}\text{Li}_{0.2}\text{Ga}_7$<br><i>Pnma</i> | 0.2 | 4c<br>0.79 Na         | 4c<br>● | 8d<br>1 Na | 4c<br>0.48 Na | 4c<br>0.52 Li | 15.16                    |
| $\text{Na}_{1.5}\text{Li}_{0.5}\text{Ga}_7$<br><i>Pnma</i> | 0.5 | 4c<br>1 Na            | 4c<br>● | 8d<br>1 Na | 4c<br>0.38 Li | 4c<br>●       | 13.52                    |
| $\text{Na}_{1.2}\text{Li}_{0.8}\text{Ga}_7$<br><i>Cmce</i> | 0.8 |                       | 8f<br>● | 8e<br>1 Na |               | 8f<br>0.44 Li | 11.52                    |
| $\text{NaLiGa}_7$<br><i>Cmce</i>                           | 1   |                       | 8f<br>● | 8e<br>1 Na |               | 8f<br>1 Li    | 16                       |

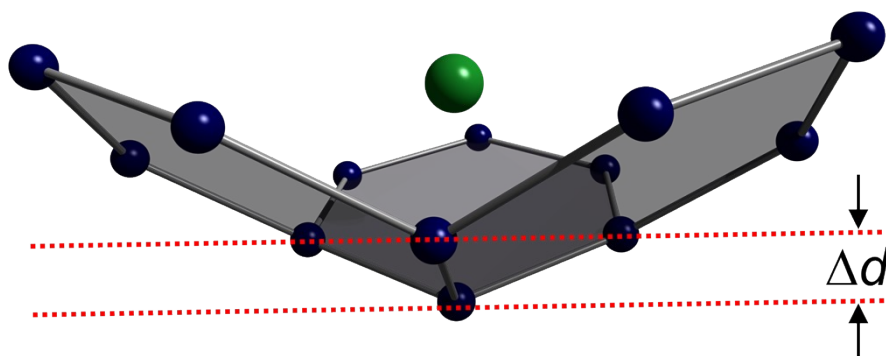

**Fig. S6** Depth of **C1** hollow in the hexagonal gallium planes of the  $\text{Na}_{2-x}\text{Li}_x\text{Ga}_7$  crystal structure ( $x < 1$ ) depends on the occupancy of **C1**. The distortion  $\Delta d$  was determined by measuring the shortest distance of the bottom Ga atom ( $8d$ ) and the plane intersecting the three neighboring Ga atoms ( $8d, 8d, 4c$ ) above.

(a)

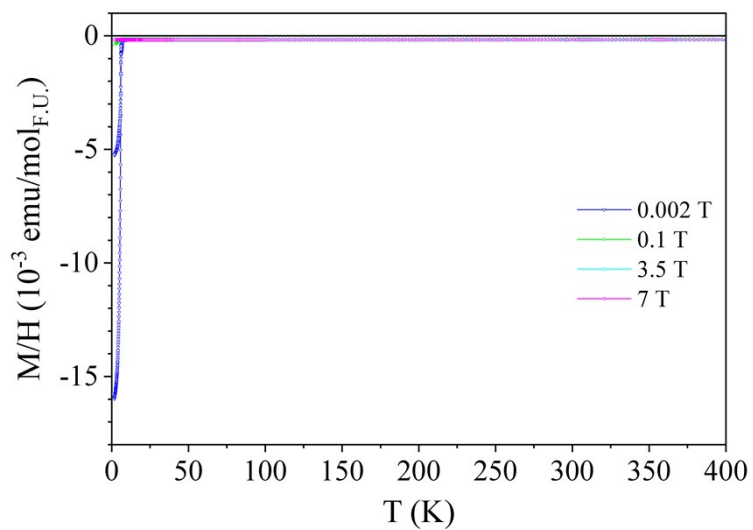

(b)

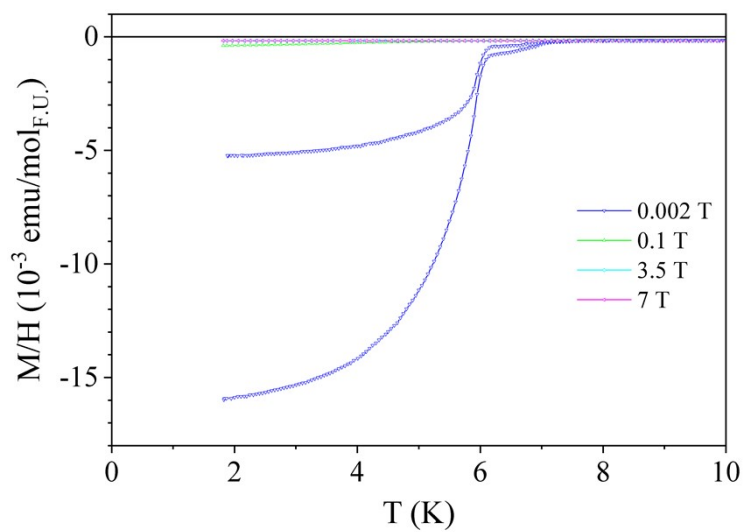

**Fig. S7** (a) Temperature dependence of the magnetic susceptibility  $\chi(T)$  of  $\text{NaLiGa}_7$  in the temperature range  $T = 1.8 \text{ K} - 400 \text{ K}$  in magnetic fields  $\mu_0 H = 0.002 \text{ T}$ ,  $0.1 \text{ T}$ ,  $3.5 \text{ T}$  and  $7 \text{ T}$ . (b) Zoomed temperature range from  $T = 1.8 \text{ K} - 10 \text{ K}$ .



## References

1. C.-C. Yu, A. Ormeci, I. Veremchuk, X.-J. Feng, Yu. Prots, M. Krnel, P. Koželj, M. Schmidt, U. Burkhardt, B. Böhme, L. Akselrud, M. Baitinger and Yu. Grin, *Inorg. Chem.*, 2023, **62**, 9054.
2. U. Frank-Cordier, G. Cordier and H. Schäfer, *Z. Naturforsch. B*, 1982, **37**, 119.
3. G. Bruzzone, *Acta Crystallogr., Sect. B: Struct. Crystallogr. Cryst. Chem.*, 1969, **B25**, 1206.
4. J. Sappl and C. Hoch, *Inorg. Chem.*, 2020, **59**, 6566.
